# Supplementary material for: GeneBase 1.1: a tool to summarize data from NCBI gene datasets and its application to an update of human gene statistics
Source: Oxford University Press journal article supplement (doi:10.1093/database/baw153), 2016-01-01
Supplement: baw153_supp.zip [file baw153_supp.zip]

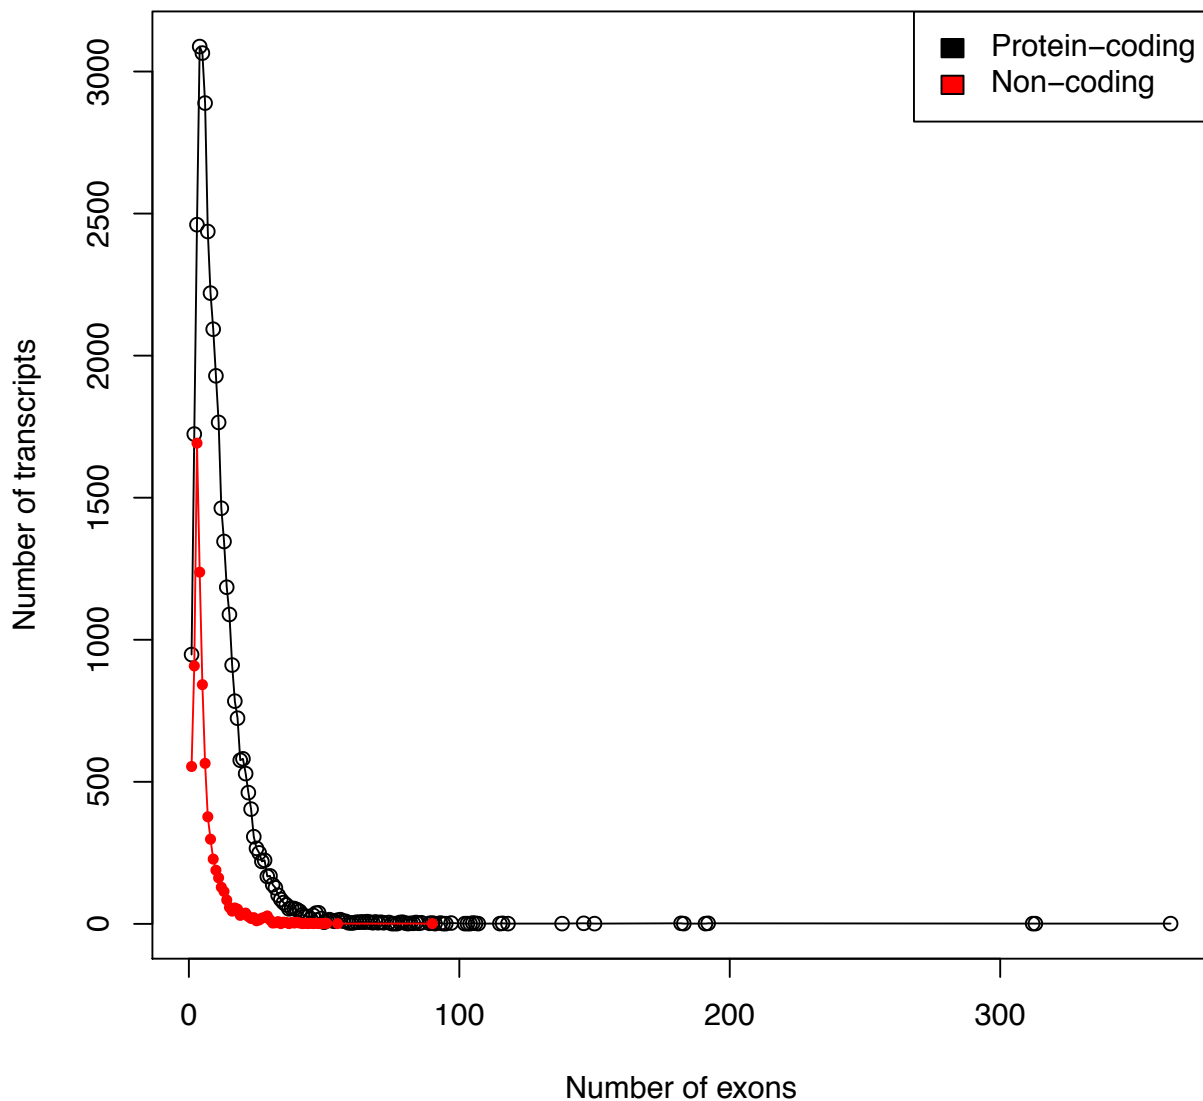

**Supplementary Figure S1.** Analysis of exon number of transcripts considering GeneBase 1.1 Human "Gene\_Table" records with a "VALIDATED" or "REVIEWED" RefSeq status, with an "NM\_" (protein-coding RNAs, black line) or "NR\_" (non-coding RNAs, red line) type of corresponding RefSeq RNA accession number, belonging to "REVIEWED" or "VALIDATED" genes, excluding genes not in current annotation release.

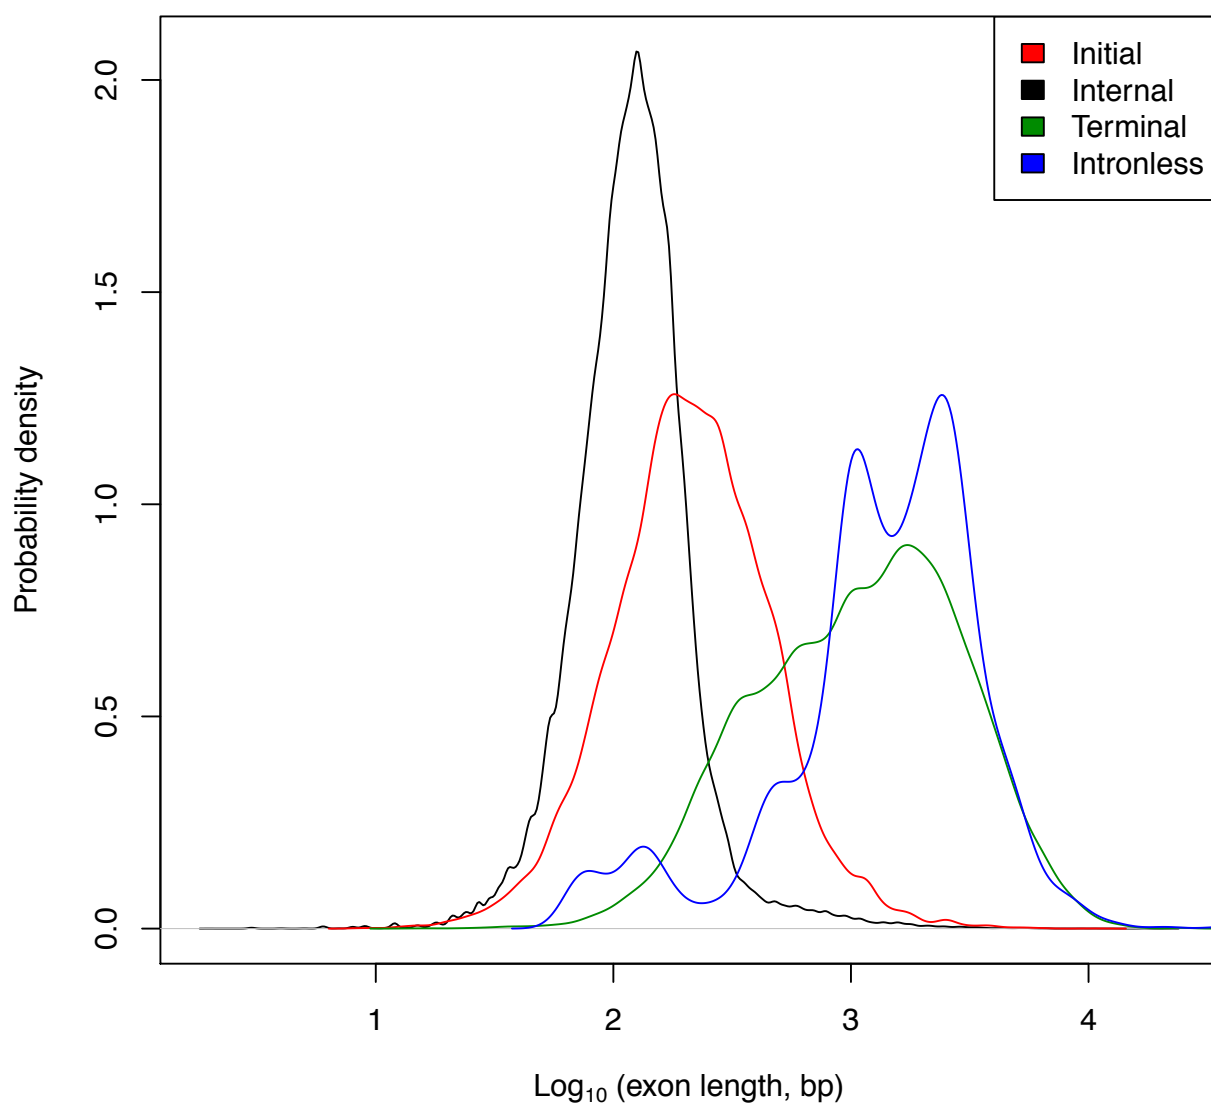

**Supplementary Figure S2.** Exon length distribution considering GeneBase 1.1 Human "Gene\_Table" records with a "VALIDATED" or "REVIEWED" RefSeq status, with an "NM\_" or "NR\_" type of corresponding RefSeq RNA accession number, belonging to genes with a "VALIDATED" or "REVIEWED" RefSeq status, excluding "not in current annotation release" records. Initial indicates the first exons, terminal the last exon, intronless indicates unique exon transcripts and internal indicates the remaining exons.

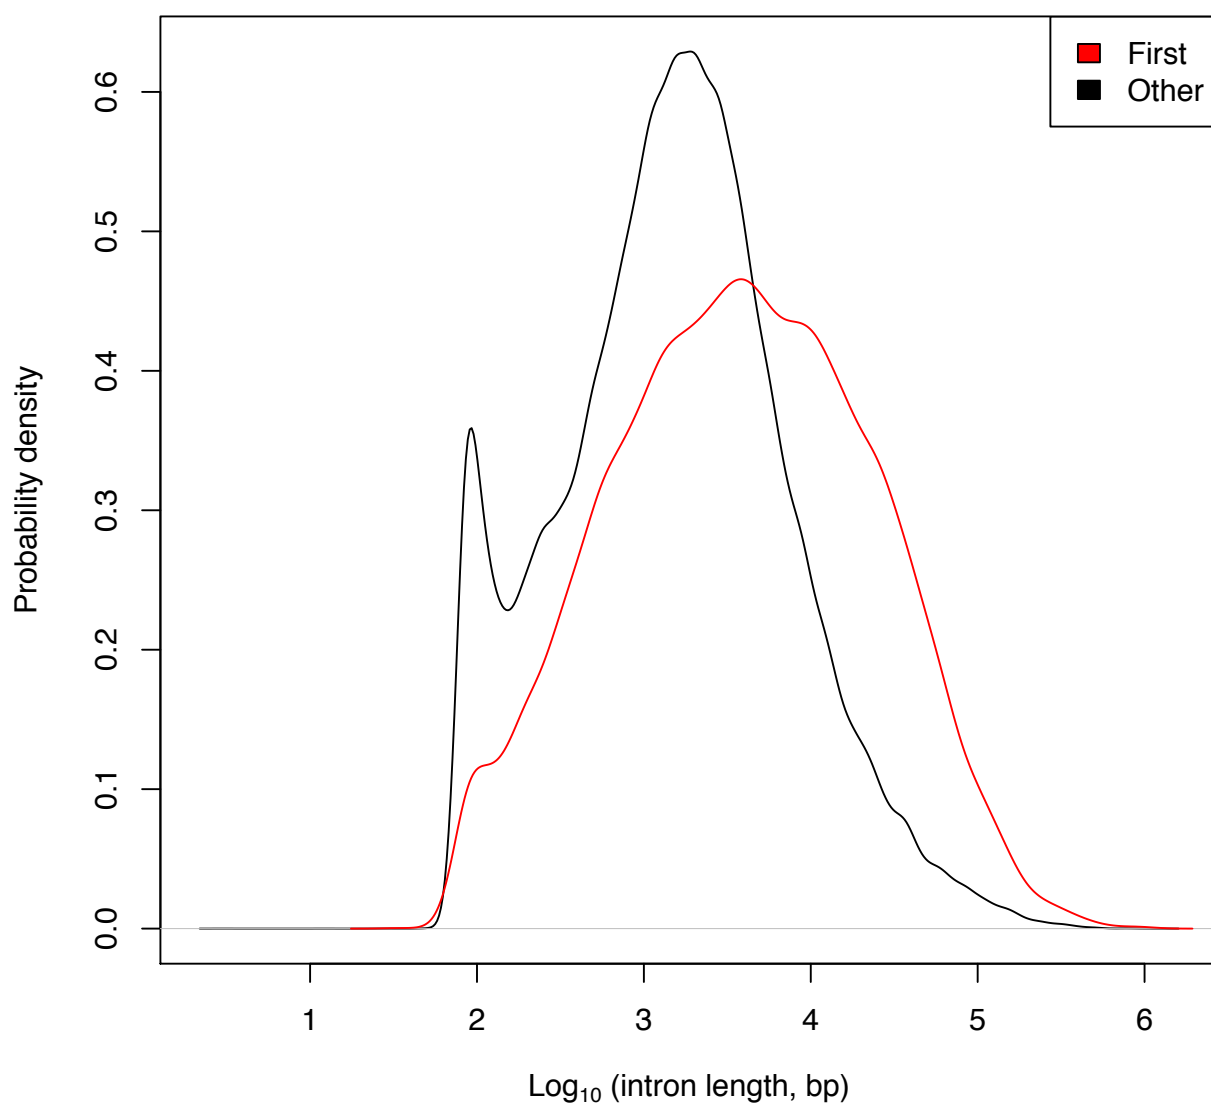

**Supplementary Figure S3.** Intron length distribution considering GeneBase 1.1 Human "Gene\_Table" records with a "VALIDATED" or "REVIEWED" RefSeq status, with an "NM\_" or "NR\_" type of corresponding RefSeq RNA accession number, belonging to genes with a "VALIDATED" or "REVIEWED" RefSeq status, excluding "not in current annotation release" records. First intron lengths are indicated in red, other intron lengths in black.
