# Supplementary material for: GeneBase 1.1: a tool to summarize data from NCBI gene datasets and its application to an update of human gene statistics
Source: Oxford University Press journal article supplement (doi:10.1093/database/baw153), 2016-01-01
Supplement: baw153_supp.zip [file baw153_supp.zip]

Archive with 7 entries (7 files):
- Supplementary_Table_S3 Genes_Rev 2.docx
- Supplementary_Table_S4 Splice site_Rev 2.xlsx
- Supplementary_Table_S5 ncRNA_Rev 2.docx
- Supplementary_Figures_Rev 2.pdf
- Supplementary_Methods_Rev.pdf
- Supplementary_Table_S1 RefSeq status_Rev 2.docx
- Supplementary_Table_S2 Chromosomes_Rev 2.xlsx
