# Supplementary material for: GeneBase 1.1: a tool to summarize data from NCBI gene datasets and its application to an update of human gene statistics
Source: Oxford University Press journal article supplement (doi:10.1093/database/baw153), 2016-01-01
Supplement: baw153_supp.zip [file baw153_supp.zip › Supplementary_Table_S1 RefSeq status_Rev 2.docx]

**Supplementary Table S1.** RefSeq statuses associated with genes and the corresponding RNAs available in GeneBase 1.1 Human software, exploiting Gene_Summary and Transcripts tables. The RefSeq status of a particular RNA may be different from the status assigned to the corresponding gene.

| **Gene_Summary table** | | **Transcripts table** | | | |
| --- | --- | --- | --- | --- | --- |
| **Gene RefSeq status** | **Number of genes** | **RNA RefSeq status** | **Number of RNAs** | **RNA RefSeq accession** | **Number of RNAs not in current annotation release** |
| **REVIEWED** | 10,479a | **REVIEWED** | **24,687** | NM, NR | 6 |
| **VALIDATED** | **102** | NM, NR |  |
| PROVISIONAL | 2 | NM, NR |  |
| INFERRED | 2 | NM |  |
| N/A | 31,170 | NM, NR, XM, XR and others |  |
| **VALIDATED** | 13,276b | **VALIDATED** | **20,762** | NM, NR | 4 |
| PROVISIONAL | 22 | NM, NR |  |
| INFERRED | 6 | NM |  |
| PREDICTED | 7 | NM, NR |  |
| N/A | 27,488 | NM, NR, XM, XR and others | 7 |
| PROVISIONAL | 3,391 | PROVISIONAL | 3,389 | NM, NR, XM, XR | 5 |
| EMPTY | 1,798 | XM, XR | 1 |
| INFERRED | 13,935 | INFERRED | 85 | NM, NR, XM, XR |  |
| N/A | 392 | NR, XM, XR and others |  |
| PREDICTED | 376 | PREDICTED | 434 | NM, NR, XM, XR |  |
| N/A | 122 | XM, XR |  |
| MODEL | 13,887 | N/A | 25,116 | NMc, NRc, XM, XR and others |  |
| EMPTY | 4,457 | N/A | 1,110 | NMd, NRd, XM, XR and others | 888 |
| Total | 59,801 |  | 136,694 |  | 911 |

N/A: status not available in NCBI Gene entries.

In bold: subset of 45,541 transcripts used in our analyses, excluding those not in current annotation release (24,687 + 102 + 20,762 – 6 – 4) and corresponding to 22,451 genes. This information was found following searches detailed in Supplementary Methods file.

aAmong them, 10,443 gene entries have at least one REVIEWED or VALIDATED transcript.

bAmong them, 12,008 genes entries have at least one VALIDATED transcript.

cThese correspond to two now removed RefSeq Nucleotide records (NM_001199814.1 and NR_037182.1) but which are still present in the gene structure of the corresponding NCBI Gene entries (Gene Unique Identifiers: 729648 and 653513, respectively).

dThese are marked as "not in current annotation release".
