# Supplementary material for: GeneBase 1.1: a tool to summarize data from NCBI gene datasets and its application to an update of human gene statistics
Source: Oxford University Press journal article supplement (doi:10.1093/database/baw153), 2016-01-01
Supplement: baw153_supp.zip [file baw153_supp.zip › Supplementary_Table_S2 Chromosomes_Rev 2.xlsx]

## Sheet: Foglio1
Supplementary Table S2. Genes per nuclear chromosome (chr). In red and in blue maximum and minimum values, respectively. Empty and unknown location values are ignored in the total, mean and stardard deviation (SD) calculations. NCBI Genome (http://www.ncbi.nlm.nih.gov/genome) was accessed on January, 19th 2016 (when also NCBI Gene entries were dowloaded for parsing and import in GeneBase 1.1, see…
		NCBI Genome http://www.ncbi.nlm.nih.gov/genome/?term=homo+sapiens					Number of GeneBase gene records									Number of GeneBase genes with REVIEWED and VALIDATED transcripts in current annotation release						Number of GeneBase genes with REVIEWED and VALIDATED transcripts in current annotation release
Chr	Length in megabase	Gene	Pseudogene	rRNA	tRNA	Other RNA	ncRNA	protein coding	pseudo	rRNA	snoRNA	snRNA	tRNA	other	unknown	ncRNA	protein coding	pseudo	rRNA	snoRNA	snRNA	Sum of columns: Q+S+T+U+V (all ncRNAs)		Sum of columns: Q+R+S+T+U+V
1	248.96	4778	1050	17	89	3889	1543	2134	1413	17	39	20	117	38	202	289	1876	68		9	17		383		2259
2	242.19	3600	853		7	3286	1428	1317	1175		18	2	12	79	184	260	1159	32		3	1		296		1455
3	198.3	2780	668		4	2403	1091	1113	905		17	1	9	19	132	234	996	18		7			259		1255
4	190.21	2251	581		1	2072	938	784	792		5		3	15	112	149	692	23		1			173		865
5	181.54	2393	579		17	2017	938	904	776		11		21	21	124	209	822	29		3			241		1063
6	170.81	2828	685		143	2187	995	1090	905		14	1	168	26	165	184	984	34		3			221		1205
7	159.35	2598	710		19	2099	869	971	913		8		23	107	119	168	837	53		1			222		1059
8	145.14	2003	499		4	1786	839	732	673		6		7	17	109	151	632	24					175		807
9	138.39	2132	553		3	1982	821	832	718		16	1	8	22	91	135	704	32		8			175		879
10	133.8	2042	484		3	1856	832	787	644		8		3	14	91	166	690	40		1			207		897
11	135.09	2806	689		13	2063	799	1333	914		34		17	23	115	145	1129	24		6			175		1304
12	133.28	2398	536		9	1999	839	1055	698		10	3	12	17	97	153	958	27		2			182		1140
13	114.36	1327	408		4	1141	606	362	480	4	4		5	10	66	180	304	13					193		497
14	107.04	1951	480		18	1516	607	627	600	4	50	2	20	235	75	104	553	12		4	2		122		675
15	101.99	1721	432		9	1629	620	658	577	4	87	3	9	45	78	105	544	58		7	2		172		716
16	90.34	1845	348		27	1543	626	937	486		12		32	22	91	105	769	26		2			133		902
17	83.26	2326	405		34	1921	703	1243	551		30	1	38	15	113	137	1109	40		6	1		184		1293
18	80.37	938	222		1	901	443	290	303		6		2	7	67	65	259	6		1			72		331
19	58.62	2420	432		7	1621	535	1465	537		16	28	12	20	81	95	1284	35			2		132		1416
20	64.44	1243	232			1125	467	549	331		17		2	5	64	107	512	6		6			119		631
21	46.71	726	179		1	620	320	257	217	4	2		2	5	27	75	194	4					79		273
22	50.82	1129	281		1	903	355	490	371	4	7	1	1	75	52	67	409	23	4		1		95		504
X	156.04	1973	703		4	1010	444	875	870		12		5	13	197	104	795	29		10			143		938
Y	57.23	496	335			261	100	56	383					28	7	31	44	9					40		84
Empty location							2	37	298				37	1	116								0		0
Unknown location		5540	1551	4	184	3089	28	11	25					1				3					3		3
Total		50704	12344	17	418	41830	17758	20861	16232	37	429	63	528	878	2459	3418	18255	665	4	80	26		4193		22451
Median		2087	491.5	17	7	1821	751	853.5	658.5	4	12	2	9	20.5	94	141	736.5	26.5	4	3.5	2		175		899.5
Mean		2112.67	514.333	17	19	1742.92	739.917	869.208	676.333	6.16667	18.6522	5.72727	22.9565	36.5833	102.458	142.417	760.625	27.7083	4	4.44444	3.71429		174.708		863.5
SD		929.098	208.556		33.6664	793.269	331.699	451.162	283.379	5.30723	19.1373	9.2422	39.7189	49.1846	48.9338	62.7971	400.464	16.2894		2.97484	5.87975		75.228		510.603
