# Supplementary material for: GeneBase 1.1: a tool to summarize data from NCBI gene datasets and its application to an update of human gene statistics
Source: Oxford University Press journal article supplement (doi:10.1093/database/baw153), 2016-01-01
Supplement: baw153_supp.zip [file baw153_supp.zip › Supplementary_Table_S3 Genes_Rev 2.docx]

**Supplementary Table S3.** Human gene, transcript, exon and intron numbers and lengths considering both protein-coding and non-coding genes.

|  |  | **Genes** | **Transcripts** | **Exons** | **Coding exonsb** | **Introns** |
| --- | --- | --- | --- | --- | --- | --- |
| **Number** | **Total of entriesa** | 22,451 | 45,541 | 460,162  non-redundant: 172,267 | 384,289  non-redundant: 138,736 | 414,621  non-redundant: 155,794 |
| **Median** | 900  per chr | 3.0  per gene | 7.0  per transcript | 6.0  per transcript | 6.0  per transcript |
| **Mean** | 864  per chr | 4.6  per gene | 10.1  per transcript | 10.2  per transcript | 9.1  per transcript |
| **SD** | 511  per chr | 5.1  per gene | 9.5  per transcript | 9.9  per transcript | 8.5  per transcript |
| **Min** | 84  (chrY) | 1  (7,507 genes) | 1  (1,502 transcripts,  1,496 genes) | 1  (2,560 transcripts,  1,856 genes) | 1  (2,632 transcripts  2,202 genes) |
| **Max** | 2,259  (chr1) | 77  (*UTY*, chrY) | 363  (*TTN*, chr2) | 362  (*TTN*, chr2) | 362  (*TTN*, chr2) |
| **Length** | **Median** | 22,690 bp | 2,591 bp | 134 bp  non-redundant: 143 bp  126 bpc  non-redundant: 130 bpc | 122 bp  non-redundant: 122 bp | 1,650 bp  non-redundant: 1,754 bp |
| **Mean** | 60,452 bp | 3,179 bp | 315 bp  non-redundant: 371 bp  163 bpc  non-redundant: 178 bpc | 163 bp  non-redundant: 171 bp | 6,503 bp  non-redundant: 7,384 bp |
| **SD** | 121,904 bp | 2,554 bp | 740 bp  non-redundant: 837 bp  216 bpc  non-redundant: 248 bpc | 256 bp  non-redundant: 290 bp | 20,827 bp  non-redundant: 23,993 bp |
| **Shortestd** | 60 bp  (*MIR4722*, chr16) | 60 bp  (*MIR4722*, chr16) | 2 bp  (*SEPT7*, exon 2) | 1 bp  (*GSTP1*, last base of exon 1) | 30 bp  (*MST1L*, intron 9) |
| **Longest** | 2,473,559 bp  (*RBFOX1*, chr16) | 109,224 bp  (*TTN*, chr2) | 91,671 bp  (*KCNQ1OT1*, unique exon)  24,927 bp  (*ZBTB20*, exon 5,  last, with 422 coding bp only) | 21,693 bp  (*MUC16*, exon 3) | 1,160,411 bp  (*ROBO2*, intron 2) |
| **Total** | 1,357,202,554 bp | 144,783,660 bp | 144,738,660 bp  non-redundant: 26,472,621 bp | 62,554,408 bp  non-redundant: 23,698,355 bp | 2,696,107,779 bp  non-redundant: 1,150,443,000 bp |

SD: standard deviation; min: minimum; max: maximum; chr: chromosome; bp: base pair.

This table represents data merged from Tables 3 and 4 of the manuscript.

aWe considered both protein-coding and non-coding genes with "REVIEWED" or "VALIDATED" RefSeq status, with at least one "REVIEWED" or "VALIDATED" transcript, excluding "not in current annotation release" records in GeneBase 1.1 Human software. In particular, gene and transcript data were derived from the "Genes" and "Transcripts" tables, while exon and intron data from "Gene_Table" and "Reports" tables. Exon and intron non-redundant sets were found counting only one exon or intron for each group of exons or introns present in multiple transcript isoforms.

bIn this column numbers and lengths are shown considering only the protein-coding portion of exons, including stop codons.

cThese values were calculated excluding 45,541 records corresponding to the last exon, which is usually the longest one (Supplementary Figure S2). (Values considering last exons only: (1,187 bp median, 1,696 bp mean, 1,731 standard deviation. Values considering non-redundant last exons only: 1,067 bp median, 1,591 bp mean, 1,738 bp standard deviation).

dExon and intron minimum lengths are adjusted following manual curation as described (6) because the starting database contains some artifactual data.
