# Supplementary material for: GeneBase 1.1: a tool to summarize data from NCBI gene datasets and its application to an update of human gene statistics
Source: Oxford University Press journal article supplement (doi:10.1093/database/baw153), 2016-01-01
Supplement: baw153_supp.zip [file baw153_supp.zip › Supplementary_Table_S4 Splice site_Rev 2.xlsx]

## Sheet: Untitled
Supplementary Table S4. Splice donor and acceptor sites of 414,383 intron sequences available in GeneBase 1.1 Human.
	Donor	Acceptor	Number of introns
Canonical	GT	AG	410038
Non canonical	GC	AG	3594
	AT	AC	439
Others	AA	CA	1
	AC	AC	1
	AC	CG	3
	AC	GC	1
	AC	GG	1
	AG	AC	1
	AG	AG	2
	AG	CC	1
	AT	AA	13
	AT	AG	60
	AT	AT	13
	AT	GT	1
	CA	CT	1
	CC	GG	2
	CC	TA	4
	CC	TG	1
	CG	GG	1
	CG	TG	1
	GA	AG	36
	GA	TC	1
	GC	CT	1
	GC	TA	1
	GG	AA	1
	GG	AC	1
	GG	AG	18
	GG	CC	1
	GG	TC	2
	GT	AA	15
	GT	AC	4
	GT	AT	18
	GT	CC	1
	GT	GG	29
	GT	TC	2
	GT	TG	42
	GT	TT	1
	TA	CA	1
	TA	GC	3
	TA	TC	1
	TC	TA	1
	TG	AA	1
	TG	AG	1
	TG	GA	1
	TG	GG	1
	TG	TT	1
	TT	AG	21
			414385
