# Supplementary material for: GeneBase 1.1: a tool to summarize data from NCBI gene datasets and its application to an update of human gene statistics
Source: Oxford University Press journal article supplement (doi:10.1093/database/baw153), 2016-01-01
Supplement: baw153_supp.zip [file baw153_supp.zip › Supplementary_Table_S5 ncRNA_Rev 2.docx]

**Supplementary Table S5.** Main non-coding RNA species.

| **Gene type** | **Biological process** | **Cellular localisation** | **Lengtha**  (in nucleotide, nt) | **Number of genes**  (per haploid genome) | **Pol** | **RefSeq or GenBank accession number** |
| --- | --- | --- | --- | --- | --- | --- |
| **rRNAs (ribosomal RNAs)** | | | | | | |
| **28S** | Translation | Ribosome (L) | 5,070 nt | 300-400  A 45S rRNA which serves as the precursor for the 18S, 5.8S and 28S rRNA, is transcribed from each rDNA unit. Usually 30 to 40 rDNA repeating units are found on each p12 region of chromosomes 13, 14, 15, 21 and 22 | I | [NR_003287](http://www.ncbi.nlm.nih.gov/nuccore/NR_003287) |
| **18S** | Translation | Ribosome (S) | 1,869 nt | I | [NR_003286](http://www.ncbi.nlm.nih.gov/nuccore/NR_003286) |
| **5.8S** | Translation | Ribosome (L) | 156 nt | I | [NR_003285](http://www.ncbi.nlm.nih.gov/nuccore/NR_003285) |
| **5S** | Translation | Ribosome (L) | 121 nt | 17  1q42 | III | [NR_023369](http://www.ncbi.nlm.nih.gov/nuccore/NR_023369) |
| **tRNAs (transfer RNAs)** | | | | | | |
| **tRNA** | Translation | Cytoplasm | 69 - 108 nt | 534 | III | e.g. tRNA(Gln): [X56184](https://www.ncbi.nlm.nih.gov/nuccore/X56184) |
| **snRNAs** **(small nuclear RNAs)** | | | | | | |
| ***U1 (RNU1)*** | Splicing  Transcription start  Cell cycle? | Spliceosome  Nucleus  Nucleus | 164 nt | 4 | II | e.g. *RNU1-1*: [NR_004430](http://www.ncbi.nlm.nih.gov/nuccore/NR_004430) |
| ***U2 (RNU2)*** | Splicing | Spliceosome | 188 nt | 1  (cluster in 17q21-q22)  Each repeat in this array is approximately 6.1 kb long and contains a single copy of the U2 snRNA. Arrays of six to more than 30 repeats have been reported. | II | e.g. *RNU2-1*: [NR_002716](http://www.ncbi.nlm.nih.gov/nuccore/NR_002716) |
| ***U6 (RNU6)*** | Splicing | Spliceosome | 106 nt | 5  (chr 14, 15, 19) | III | e.g. *RNU6-1*: [NR_004394](http://www.ncbi.nlm.nih.gov/nuccore/NR_004394) |
| ***7SK (RN7SK)*** | Transcription | Nucleus | 336 nt | 1  (6p12.1) | III | [NR_001445](http://www.ncbi.nlm.nih.gov/nuccore/NR_001445) |
| **snoRNAs (small nucleolar RNAs**)  (Genes for these RNAs are often localised in other gene introns) | | | | | | |
| **C/D box**  (family) | RNA methylation  Site-specific 2-prime-O-ribose methylation of pre-rRNA | Nucleolus | 33-237 nt | 295 | III | e.g. *SNORD2*: [NR_002587](http://www.ncbi.nlm.nih.gov/nuccore/NR_002587) |
| **H/ACA box**  (family) | RNA pseudouridylation  Conversion of uridine to pseudouridine at specific residues of ribosomal RNAs or small nuclear RNAs | Nucleolus;  Cajal bodies | 121-250 nt | 131 | III | e.g. *SNORA1*: [NR_003026](http://www.ncbi.nlm.nih.gov/nuccore/NR_003026) |
| ***TERC*** | Telomere synthesis  Maintains telomere ends by addition of the telomere repeat TTAGGG | Nucleus (telomerase) | 451 nt | 1  (3q26) | II | [NR_001566](http://www.ncbi.nlm.nih.gov/nuccore/NR_001566) |
| ***(HBII-5)***  ***SNORD115-1*** | Splicing  Regulation of RNA editing and/or alternative splicing | Spliceosome | 82 nt | 1  (15q11.2) | II | [NR_001291](http://www.ncbi.nlm.nih.gov/nuccore/NR_001291) |
| **Other ncRNAs:** | | | | | | |
| ***XIST*** | X inactivation | Nucleus | gene 32,103 nt  RNA 19,280 nt | 1  (Xq13.2) | II | [NR_001564](http://www.ncbi.nlm.nih.gov/nuccore/NR_001564) |
| **Antisense**  **RNAs**  e.g. ***TSIX*** | Regulation of gene expression  X inactivation | Nucleus | 37,027 nt | 1,202  1  (Xq13.2) | II | [NR_003255](http://www.ncbi.nlm.nih.gov/nuccore/NR_003255) |
| ***7SL (RN7SL1)*** | Protein transport | SRP | 299 nt | 1  (14q21.3) | III | [NR_002715](http://www.ncbi.nlm.nih.gov/nuccore/NR_002715) |
| **microRNAs**  **(miRNAs)** | Regulation of gene expression | Cytoplasm | gene 41-180 nt  RNA 22 nt | 1,879 | III | e.g. *MIR21*: [NR_029493](http://www.ncbi.nlm.nih.gov/nuccore/NR_029493) |

Specific searches useful to find these genes are listed in the Supplementary Methods.

Pol: RNA polymerase involved in ncRNA transcription; RefSeq: RefSeq database accession number; RP: ribosomal proteins; L: large ribosomal subunit; S: small ribosomal subunit; TF: Translation Factors; SRP: signal recognition particle.

aGene length is derived from the "Gene_Size" field of GeneBase 1.1 Human "Gene_Summary" table. RNA length is derived from the "Total_bp" field of "Reports" table. (From the gene record of "Gene_Summary" table, click on Go To "Gene_Table" violet button and then click on Go To "Reports" button).
